# Supplementary material for: Dealing with differential misclassification of an outcome or a covariate in association studies with an internally validated sample. Application to the use of a serological test for the diagnosis of SARS-CoV-2 infection
Source: Research Square preprint supplement (doi:10.21203/rs.3.rs-6751937/v1), 2025-06-05
Supplement: Supplementary file 1 [file ef5c9c65975e5ff02a667daa.docx]

**Supplementary materials**

**Supplementary Table 1. Estimates of Eq. (5) describing SE/SP of X* (SEROLOGY).**

|  |  |  |
| --- | --- | --- |
|  |  |  |
| **Analysis corrected for misclassification** | | |
| Intercept (Infection (Y vs N)) | -1.01 (-1.94, -0.08) | -0.26 (-1.20, 0.68) |
| Persistent symptoms (Y vs N) | -1.79 (-7.07, 3.50) | 0.26 (-0.81, 1.77) |
| Thought they had been infected (Y vs N) | -0.59 (-1.44, 0.26) | -0.34 (-0.90, 1.41) |
| Age (per 10 yrs increase) | -2.13 (-3.30, -0.95) | -0.19 (-0.65, 0.27) |
| Sex (F vs M) | 0.13 (-0.43, 0.69) | -0.35 (-0.79, 0.08) |
|  |  |  |
| **Analysis corrected for misclassification and sampling bias** | | | |
| Intercept (Infection (Y vs N)) | -1.07 (-1.47, -0.66) | 1.38 (0.26, 2.51) |
| Persistent symptoms (Y vs N) | -3.69 (-15.0, 7.60) | 0.53 (-1.40, 2.46) |
| Thought they had been infected (Y vs N) | 0.12 (-0.29, 0.53) | 1.14 (0.65, 1.63) |
| Age (per 10 yrs increase) | -0.49 (-0.58, -0.40) | 0.00 (-0.18, 0.19) |
| Sex (F vs M) | 0.26 (0.06, 0.45) | -0.37 (-0.91, 0.16) |

**Supplementary Table 2. Estimates of Eq. (6) & (4).**

|  |  |  |
| --- | --- | --- |
| **Analysis corrected for misclassification** | | |
| Intercept | -1.71 (-2.57, -0.84) |  |
| Thought they had been infected (Y vs N) | 1.98 (1.63, 2.33) |  |
| Age (per 10 yrs increase) | -0.20 (-0.35, -0.06) |  |
| Sex (F vs M) | 0.61 (0.25, 0.98) |  |
|  |  |  |
| **Analysis corrected for misclassification and sampling bias** | | |
| Intercept | -4.60 (-5.06, -4.14) | -3.13 (-3.48, -2.78) |
| Infection (Y vs N) | __ | 4.66 (4.10, 5.22) |
| Persistent symptoms (Y vs N) | __ | -0.39 (-1.10, 0.32) |
| Thought they had been infected (Y vs N) | 2.23 (2.02, 2.43) | -0.80 (-1.00, -0.61) |
| Age (per 10 yrs increase) | 0.04 (-0.02, 0.11) | 0.02 (-0.04, 0.08) |
| Sex (F vs M) | 0.24 (0.07, 0.40) | 0.11 (-0.04, 0.26) |

**Supplementary Table 3. Estimates of Eq (8) Describing SE/SP of Y* (SEROLOGY).**

|  |  |  |
| --- | --- | --- |
|  |  |  |
| **Analysis corrected for misclassification** | | |
| Intercept (Infection (Y vs N)) | -3.24 (-4.14, -2.35) | 0.00 (-0.88, 0.89) |
| Age (per 10 yrs increase) | -0.48 (-0.62, -0.34) | 0.02 (-0.13, 0.16) |
| Sex (F vs M) | 0.09 (-0.28, 0.47) | -0.20 (-0.53, 0.13) |
| Child at home (Y vs N) | 1.21 (0.79, 1.64) | 0.24 (-0.10, 0.58) |
| Smoker (vs never smoker) | -0.33 (-0.90, 0.24) | -0.07 (-0.63, 0.50) |
| Ex-Smoker (vs never smoker) | -0.51 (-0.94, -0.08) | -0.08 (-0.39,0.23) |
|  |  |  |
| **Analysis corrected for misclassification and sampling bias** | | | |
| Intercept (Infection (Y vs N)) | -1.29 (-1.49, -1.10) | 1.60 (0.81, 2.38) |
| Age (per 10 yrs increase) | -0.45 (-0.49, -0.40) | 0.06 (-0.06, 0.18) |
| Sex (F vs M) | 0.19 (0.08, 0.29) | -0.22 (-0.57, 0.14) |
| Child at home (Y vs N) | 0.48 (0.35, 0.60) | -0.00 (-0.38, 0.37) |
| Smoker (vs never smoker) | -0.38 (-0.53, -0.22) | -0.22 (-0.78, 0.34) |
| Ex-Smoker (vs never smoker) | -0.25 (-0.37, -0.14) | 0.01 (-0.33, 0.35) |

**Supplementary Table 4. Estimates of Eq. (7)**

|  |  |
| --- | --- |
|  |  |
| **Analysis corrected for misclassification and sampling bias** | |
| Intercept | -3.32 (-3.50, -3.14) |
| Infection (Y vs N) | 4.33 (3.13, 5.54) |
| Age (per 10 yrs increase) | 0.08 (0.06, 0.11) |
| Sex (F vs M) | 0.00 (-0.06, 0.06) |
| Child at home (Y vs N) | 0.07 (-0.02, 0.16) |
| Smoker (vs never smoker) | -0.04 (-0.14, 0.07) |
| Ex-Smoker (vs never smoker) | 0.01 (-0.06, 0.07) |

**Supplementary Table 5.** *Simulations - Infection as a covariate*

|  | **(SE)a** | **Relative bias (%)** | **95% CI coverage**  **(%)** |
| --- | --- | --- | --- |
| **Complete data analysis - full set** | | | |
| Infection (1 vs 0) | 0.99 (0.13) | -1 | 95.0 |
| C1 (1 vs 0) | 0.70 (0.08) | 0 | 96.0 |
| C2 (continuous) | 0.20 (0.03) | -1 | 95.8 |
| C3 (1 vs 0) | 0.00 (0.08) | - | 96.0 |
|  |  |  |  |
| **Complete data analysis - random validation sample** | | |  |
| Infection (1 vs 0) | 0.98 (0.28) | -2 | 96.0 |
| C1 (1 vs 0) | 0.71 (0.19) | +3 | 96.4 |
| C2 (continuous) | 0.20 (0.06) | -1 | 94.2 |
| C3 (1 vs 0) | 0.00 (0.19) | - | 95.2 |
|  |  |  |  |
| **Complete data analysis - biased validation sample** | | | |
| Infection (1 vs 0) | 1.68 (0.38) | +68 | 54.8 |
| C1 (1 vs 0) | 0.70 (0.28) | 0 | 95.6 |
| C2 (continuous) | 0.28 (0.09) | +39 | 88.6 |
| C3 (1 vs 0) | -0.18 (0.25) | - | 89.6 |
|  |  |  |  |
| **Naïve analysis** |  |  |  |
| Serology (1 vs 0) | 0.63 (0.11) | -37 | 07.0 |
| C1 (1 vs 0) | 0.68 (0.08) | -3 | 94.8 |
| C2 (continuous) | 0.17 (0.03) | -15 | 72.2 |
| C3 (1 vs 0) | -0.03 (0.08) | - | 93.6 |
|  |  |  |  |
| **Analysis corrected for misclassification - random validation sample** | | | |
| Infection (1 vs 0) | 0.99 (0.19) | -1 | 94.8 |
| C1 (1 vs 0) | 0.70 (0.08) | +1 | 95.0 |
| C2 (continuous) | 0.20 (0.03) | -1 | 93.8 |
| C3 (1 vs 0) | 0.00 (0.08) | - | 96.0 |
|  |  |  |  |
| **Analysis corrected for misclassification - biased validation sample** | | | |
| Infection (1 vs 0) | 0.57 (0.23) | -43 | 47.2 |
| C1 (1 vs 0) | 0.68 (0.08) | -3 | 95.0 |
| C2 (continuous) | 0.20 (0.04) | +2 | 93.8 |
| C3 (1 vs 0) | -0.05 (0.08) | - | 92.2 |
|  | | | |
| **Analysis corrected for misclassification and sampling bias - random validation sample** | | | |
| Infection (1 vs 0) | 0.99 (0.19) | -1 | 95.0 |
| C1 (1 vs 0) | 0.70 (0.08) | +1 | 94.8 |
| C2 (continuous) | 0.20 (0.03) | -1 | 93.8 |
| C3 (1 vs 0) | 0.00 (0.08) | - | 96.0 |
|  |  |  |  |
| **Analysis corrected for misclassification and sampling bias - biased validation sample** | | | |
| Infection (1 vs 0) | 0.98 (0.18) | -2 | 94.0 |
| C1 (1 vs 0) | 0.70 (0.08) | 0 | 95.8 |
| C2 (continuous) | 0.20 (0.03) | -2 | 94.2 |
| C3 (1 vs 0) | 0.00 (0.08) | - | 96.2 |

500 simulations. , ,

True parameters: .

To generate serological data, we assumed that the logarithm of the quantitative serological value (optical density ratio) followed a skew normal distribution in infected individuals (parameters: location = , scale = , shape = ) and a normal distribution in uninfected individuals (parameters: location= , scale= ) [16]. and were expressed as a linear function of the outcome () and covariates with different parameters according to infection status, i.e. and Then, discrete values of the serological test were generated based on a threshold of 1.1. The serological test generated had an average sensitivity of 84% and an average specificity of 94%.

To model the validation sample selection process, a random proportion of 20% was sampled from the full data set, or using eq. (4), with the following parameters for non-random selection: . Finally, to model the association between the serological test and covariates, using eq. 6, parameters were

aEmpirical standard deviations across 500 estimates are reported in parentheses.

**Supplementary Table 6.** *Simulations - Infection as outcome***.**

|  | **(SE)a** | **Relative bias (%)** | **95% CI coverage**  **(%)** |
| --- | --- | --- | --- |
| **Complete data analysis- full set** | | | |
| C1 (1 vs 0) | -0.50 (0.10) | 0 | 95.6 |
| C2 (continuous) | -1.00 (0.04) | 0 | 95.6 |
| C3 (1 vs 0) | -0.01 (0.13) | - | 94.8 |
|  |  |  |  |
| **Complete data analysis- random validation sample** | | | |
| C1 (1 vs 0) | -0.51 (0.25) | -2 | 93.8 |
| C2 (continuous) | -1.02 (0.11) | -2 | 93.4 |
| C3 (1 vs 0) | -0.02 (0.31) | - | 94.0 |
|  |  |  |  |
| **Complete data analysis- biased validation sample** | | | |
| C1 (1 vs 0) | | 0.17 (0.23) | +135 | 15.6 |
| C2 (continuous) | | -1.35 (0.10) | -35 | 02.0 |
| C3 (1 vs 0) | | -0.03 (0.29) | - | 95.2 |
|  |  |  |  |
| **Naïve analysisc** |  |  |  |
| C1 (1 vs 0) | -0.18 (0.09) | +63 | 06.2 |
| C2 (continuous) | -0.63 (0.03) | +37 | 00.0 |
| C3 (1 vs 0) | 0.26 (0.11) | - | 29.2 |
|  |  |  |  |
| **Analysis corrected for misclassification - random validation sample** | | | |
| C1 (1 vs 0) | -0.50 (0.18) | 0 | 93.9 |
| C2 (continuous) | -1.00 (0.08) | 0 | 95.2 |
| C3 (1 vs 0) | -0.01 (0.25) | - | 93.8 |
|  |  |  |  |
| **Analysis corrected for misclassification - biased validation sample** | | | |
| C1 (1 vs 0) | -0.34 (0.22) | +31 | 86.2 |
| C2 (continuous) | -1.00 (0.08) | 0 | 95.2 |
| C3 (1 vs 0) | 0.37 (0.25) | - | 66.6 |
|  |  |  |  |
| **Analysis corrected for misclassification and sampling bias - random validation sample** | | | |
| C1 (1 vs 0) | -0.50 (0.18) | 0 | 94.4 |
| C2 (continuous) | -1.00 (0.08) | 0 | 95.3 |
| C3 (1 vs 0) | -0.01 (0.25) | - | 92.6 |
|  |  |  |  |
| **Analysis corrected for misclassification and sampling bias - biased validation sample** | | | |
| C1 (1 vs 0) | -0.52 (0.15) | -3 | 93.4 |
| C2 (continuous) | -1.00 (0.06) | 0 | 95.0 |
| C3 (1 vs 0) | -0.01 (0.18) | - | 94.8 |
|  |  |  |  |

500 simulations. , ,

True parameters:

To generate serological data, we assumed that the logarithm of the quantitative serological value (optical density ratio) followed a skew normal distribution in infected individuals (parameters: location = , scale = , shape = ) and a normal distribution in uninfected individuals (parameters: location= , scale= ) [16]. and were expressed as a linear function of the covariates with different parameters according to infection status, namely and Then, discrete values of the serological test were generated based on a threshold of 1.1. The serological test generated had an average sensitivity of 85% and an average specificity of 94%.

To model the validation sample selection process, a random proportion of 20% was sampled from the full data set, or using eq. (7), with the following parameters for non-random selection: .

aEmpirical standard deviations across 500 estimates are reported in parentheses.

**The SAPRIS-SERO study group (full list)**

Fabrice Carrat, Pierre-Yves Ancel, Marie-Aline Charles, Gianluca Severi, Mathilde Touvier, Marie Zins (SAPRIS-SERO investigators).

Nathalie Bajos, Fabrice Carrat, Pierre-Yves Ancel, Marie-Aline Charles, Florence Jusot, Claude Martin, Laurence Meyer, Ariane Pailhé, Alexandra Rouquette, Gianluca Severi, Alexis Spire, Mathilde Touvier, Marie Zins (SAPRIS questionnaires).

Sofiane Kab, Adeline Renuy,Stephane Le-Got, Celine Ribet, Mireille Pellicer, Emmanuel Wiernik, Marcel Goldberg, Marie Zins (Constances cohort).

Fanny Artaud,Pascale Gerbouin-Rérolle, Mélody Enguix, Camille Laplanche, Roselyn Gomes-Rima, Lyan Hoang, Emmanuelle Correia, Alpha Amadou Barry, Nadège Senina, Gianluca Severi (E3N-E4N cohort)

Julien Allegre, Fabien Szabo de Edelenyi, Nathalie Druesne-Pecollo, Younes Esseddik, Serge Hercberg, Mélanie Deschasaux, Mathilde Touvier (NutriNet-Santé cohort)

Marie-Aline Charles, Pierre-Yves Ancel, Valérie Benhammou, Anass Ritmi, Laetitia Marchand, Cecile Zaros, Elodie Lordmi, Adriana Candea, Sophie de Visme, Thierry Simeon, Xavier Thierry, Bertrand Geay, Marie-Noelle Dufourg, Karen Milcent  (Epipage2 and Elfe child cohorts)

Delphine Rahib, Nathalie Lydie (Santé Publique France)

Clovis Lusivika-Nzinga, Gregory Pannetier, Nathanael Lapidus, Isabelle Goderel, Céline Dorival, Jérôme Nicol, Olivier Robineau, Fabrice Carrat (IPLESP – methodology and coordinating data center)

Cindy Lai, Liza Belhadji, Hélène Esperou, Sandrine Couffin-Cadiergues (Inserm)

Jean-Marie Gagliolo (Institut de Santé Publique)

Hélène Blanché, Jean-Marc Sébaoun, Jean-Christophe Beaudoin, Laetitia Gressin, Valérie Morel, Ouissam Ouili, Jean-François Deleuze (CEPH-Biobank)

Laetitia Ninove, Stéphane Priet, Paola Mariela Saba Villarroel, Toscane Fourié, Souand Mohamed Ali, Abdenour Amroun, Morgan Seston, Nazli Ayhan, Boris Pastorino, Xavier de Lamballerie (Unité des Virus Emergents)
